# Supplementary material for: Intracellular delivery of therapeutic antisense oligonucleotides targeting mRNA coding mitochondrial proteins by cell-penetrating peptides
Source: Royal Society of Chemistry journal article supplement (doi:10.1039/d0tb01106a), 2020-01-01
Supplement: d0tb01106a1.pdf [file d0tb01106a1.pdf]

## Supporting Information

### **Intracellular Delivery of Therapeutic Antisense Oligonucleotides Targeting mRNA Coding Mitochondrial Proteins by Cell-Penetrating Peptides**

Carmine Pasquale Cerrato <sup>\*,1,‡</sup>, Tove Kivijärvi <sup>2</sup>, Roberta Tozzi <sup>1</sup>, Tõnis Lehto <sup>1</sup>, Maxime Gestin <sup>1</sup>, Ülo Langel <sup>1,3</sup>.

<sup>1</sup> *Department of Biochemistry and Biophysics, the Arrhenius Laboratories for Natural Sciences, Stockholm University, Svante Arrhenius väg 16B, SE-10691 Stockholm, Sweden.*

<sup>2</sup> *Department of Fibre and Polymer Technology, KTH Royal Institute of Technology, Teknikringen 56-58, SE-10044 Stockholm, Sweden.*

<sup>3</sup> *Laboratory of Molecular Biotechnology, Institute of Technology, University of Tartu, Nooruse 1, 50411 Tartu, Estonia.*

‡ Current affiliation: Division of Molecular Toxicology, Institute of Environmental Medicine, Karolinska Institutet, Nobel väg 13, Stockholm, SE-17177, Sweden

\* Correspondence: [carmine.pasquale.cerrato@dbb.su.se](mailto:carmine.pasquale.cerrato@dbb.su.se); [carmine.cerrato@ki.se](mailto:carmine.cerrato@ki.se)

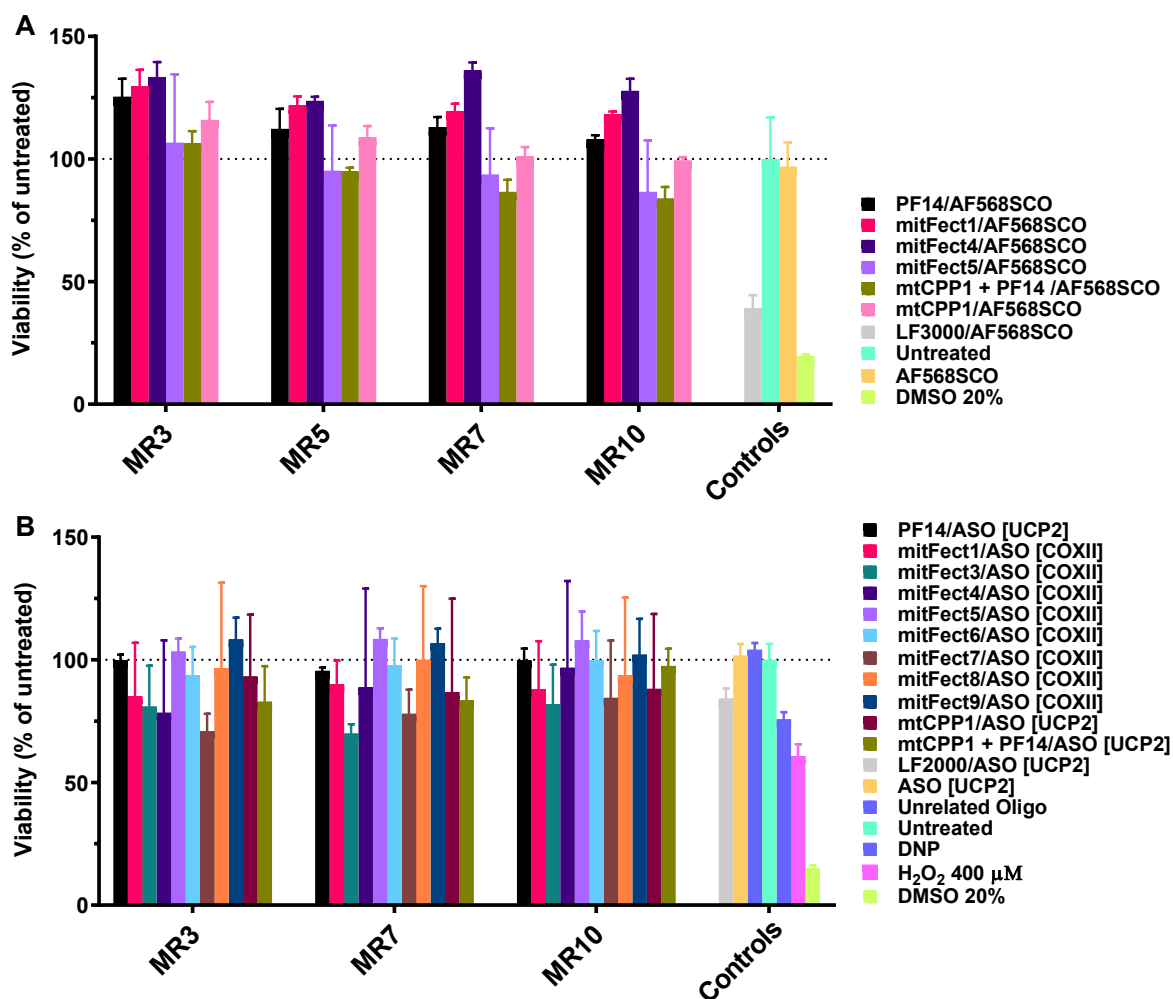

**Figure S1.** Effect of treatment with AF568SCO (A) or ASO [UCP2] (B) at different molar ratio on HeLa pLuc705 cells viability. HeLa pLuc705 cells were treated with peptide/oligonucleotides for 24 hr. DMSO 20% was chosen as positive controls. Treatments with any of the complexes have shown no toxicity. Data shown represent a mean of a minimum of two individual experiments performed in triplicates (n=1); SD for each data point is shown. The cell viability was quantified by conventional WST-1 assay.

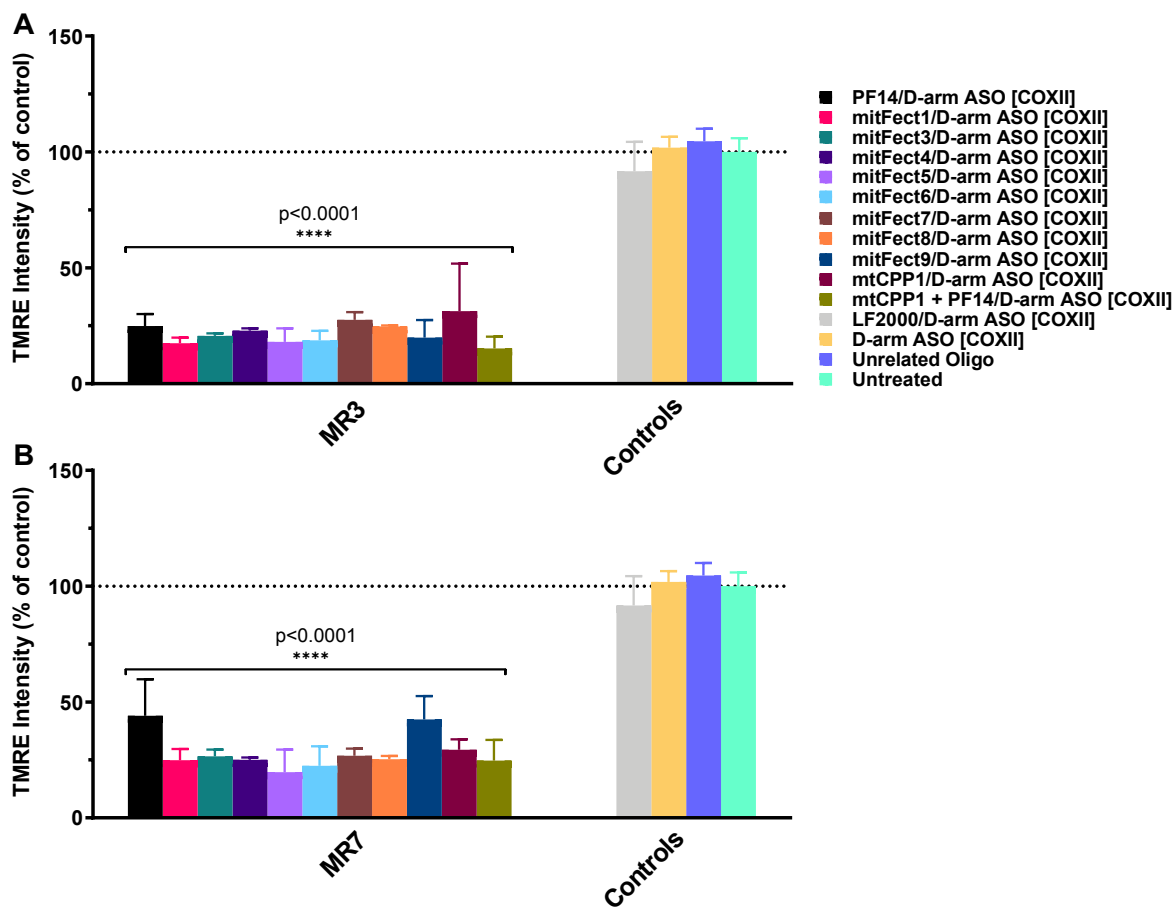

**Figure S2.** Effect of D-arm ASO [COXII] on mitochondrial membrane potential and intracellular ROS production in HeLa pLuc705 cells. The oligonucleotide treatment was performed as described in the materials and methods section. HeLa pLuc705 were treated for 6 h at MR3 (A) and MR7 (B) with 100 nM D-arm ASO [COXII], or LF2000, D-arm ASO [COXII] alone, or unrelated oligonucleotide, as indicated in the Materials and methods. The mitochondrial membrane potential was evaluated by TMRE uptake. Results are normalized and expressed as percentage of results obtained from untreated cells. The values represent the mean of one experiment performed in triplicate (mean $\pm$ SD, n=1).

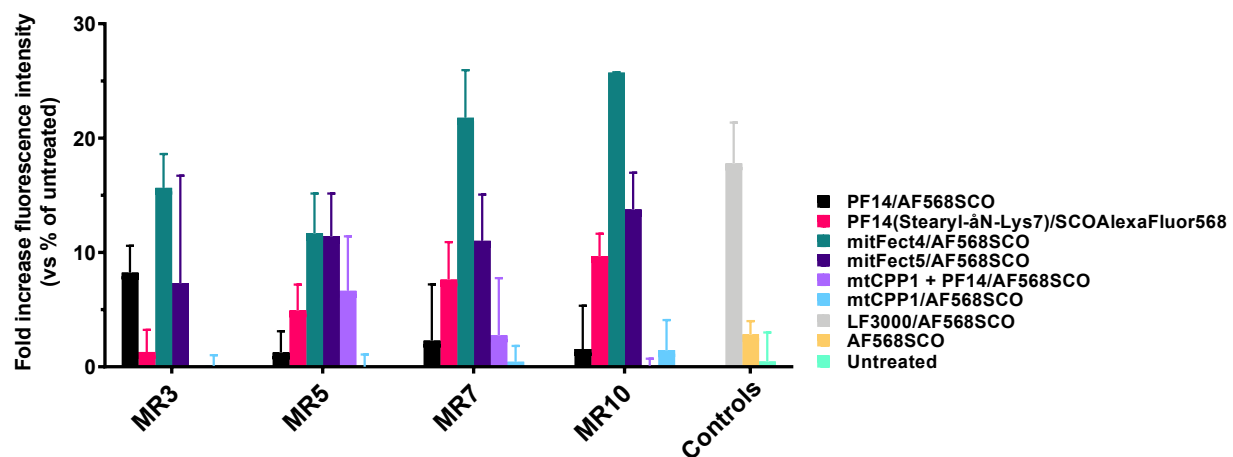

**Figure S3.** Uptake of SCOAlexaFluor568 in HeLa pLuc705. HeLa pLuc705 cells ( $7 \times 10^3$ ) were seeded 24 h prior to experiments into 96-well plates. Cells were treated with peptide/AF568-labeled SCO nanocomplexes at MR3, 5, 7, and 10 and incubated for 24 h. Cells were washed with twice with fresh complete media and fluorescence was measured at 578/603 nm. The values represent the mean of one experiment performed in triplicate (mean $\pm$ SD, n=1).

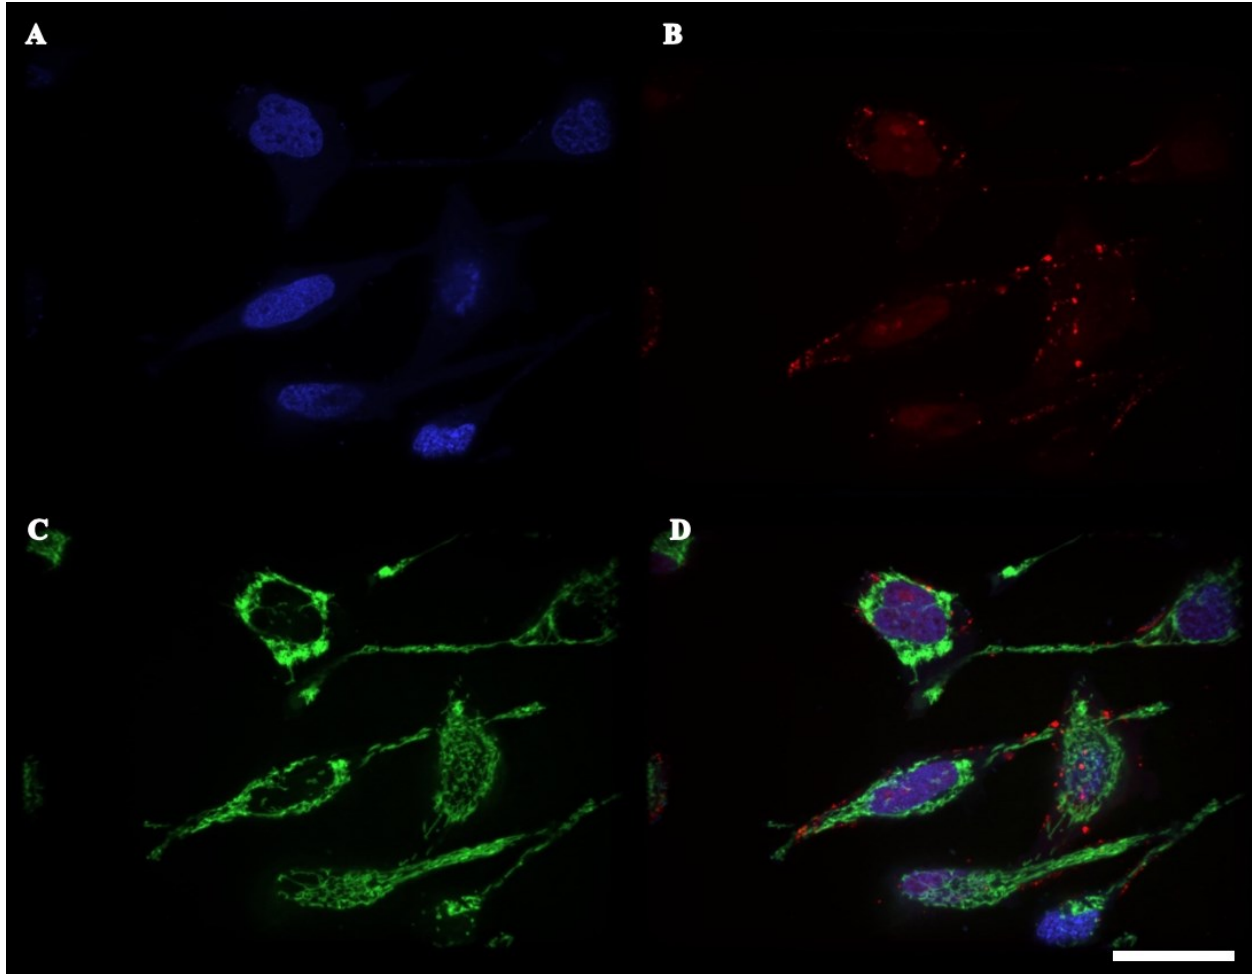

**Figure S4.** Localization of mitFect3/SCO complexes. HeLa pLuc705 cells were incubated with complexes of 100 nM AF568SCO (red, B) and 1  $\mu$ M mitFect3 for 1 h at 37  $^{\circ}$ C. Mitochondria were stained using MitoTracker Green (green, C) and nuclei using Draq5 (blue, A). Overlay picture is presented in section D. Scale bar = 10  $\mu$ m.

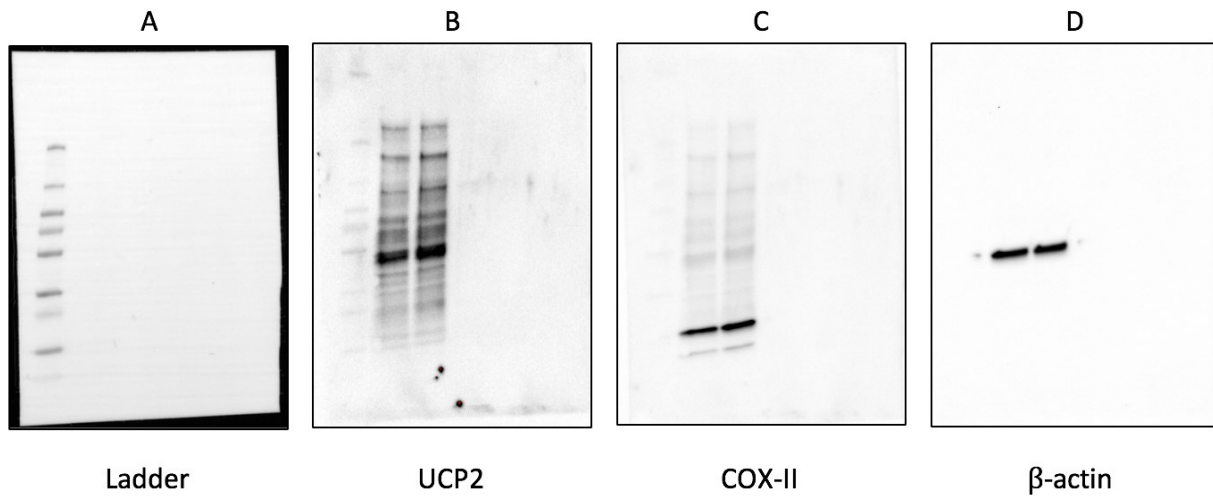

**Figure S5.** Complete pictures of the western blot membranes. Each blot comes from the same gel and the immunostaining was performed in the following order: B, C and D. The membrane was stripped from antibody between each staining.

**Table S1.** Complete statistical data analysis for Fig. 1. Ordinary two-way analysis of variance (ANOVA) with Dunnett's multiple comparison test of PF14/SCO vs. each other complex formulation at MR3, 5, and 10.

| Dunnett's multiple comparisons test | Mean Diff. | 95% CI of diff.  | Summary | Adjusted P Value |
|-------------------------------------|------------|------------------|---------|------------------|
| <b>MR3</b>                          |            |                  |         |                  |
| PF14/SCO vs. mitFect1/SCO           | 12038      | 3878 to 20197    | ***     | 0.001            |
| PF14/SCO vs. mitFect3/SCO           | 14303      | 6143 to 22463    | ****    | <0.0001          |
| PF14/SCO vs. mitFect4/SCO           | 24647      | 16487 to 32807   | ****    | <0.0001          |
| PF14/SCO vs. mitFect5/SCO           | 26594      | 18434 to 34754   | ****    | <0.0001          |
| PF14/SCO vs. mitFect6/SCO           | 26178      | 18019 to 34338   | ****    | <0.0001          |
| PF14/SCO vs. mitFect7/SCO           | 23589      | 15429 to 31749   | ****    | <0.0001          |
| PF14/SCO vs. mitFect8/SCO           | 22355      | 14196 to 30515   | ****    | <0.0001          |
| PF14/SCO vs. mitFect9/SCO           | 26797      | 18637 to 34956   | ****    | <0.0001          |
| PF14/SCO vs. mtCPP1/SCO             | 27050      | 18891 to 35210   | ****    | <0.0001          |
| PF14/SCO vs. mtCPP1 + PF14/SCO      | 23636      | 15476 to 31796   | ****    | <0.0001          |
| Dunnett's multiple comparisons test | Mean Diff. | 95% CI of diff.  | Summary | Adjusted P Value |
| <b>MR5</b>                          |            |                  |         |                  |
| PF14/SCO vs. mitFect1/SCO           | -21527     | -29686 to -13367 | ****    | <0.0001          |
| PF14/SCO vs. mitFect3/SCO           | -10065     | -18224 to -1905  | **      | 0.0083           |
| PF14/SCO vs. mitFect4/SCO           | 34614      | 26454 to 42774   | ****    | <0.0001          |
| PF14/SCO vs. mitFect5/SCO           | 42106      | 33946 to 50266   | ****    | <0.0001          |
| PF14/SCO vs. mitFect6/SCO           | 40834      | 32675 to 48994   | ****    | <0.0001          |
| PF14/SCO vs. mitFect7/SCO           | 33961      | 25802 to 42121   | ****    | <0.0001          |
| PF14/SCO vs. mitFect8/SCO           | 28863      | 20703 to 37023   | ****    | <0.0001          |
| PF14/SCO vs. mitFect9/SCO           | 41963      | 33803 to 50122   | ****    | <0.0001          |
| PF14/SCO vs. mtCPP1/SCO             | 42508      | 34348 to 50667   | ****    | <0.0001          |
| PF14/SCO vs. mtCPP1 + PF14/SCO      | -20364     | -28523 to -12204 | ****    | <0.0001          |
| Dunnett's multiple comparisons test | Mean Diff. | 95% CI of diff.  | Summary | Adjusted P Value |
| <b>MR10</b>                         |            |                  |         |                  |
| PF14/SCO vs. mitFect1/SCO           | -20426     | -28586 to -12266 | ****    | <0.0001          |
| PF14/SCO vs. mitFect3/SCO           | 15845      | 7685 to 24004    | ****    | <0.0001          |
| PF14/SCO vs. mitFect4/SCO           | 58378      | 50218 to 66537   | ****    | <0.0001          |
| PF14/SCO vs. mitFect5/SCO           | 66328      | 58169 to 74488   | ****    | <0.0001          |
| PF14/SCO vs. mitFect6/SCO           | 65148      | 56988 to 73307   | ****    | <0.0001          |
| PF14/SCO vs. mitFect7/SCO           | 54462      | 46303 to 62622   | ****    | <0.0001          |
| PF14/SCO vs. mitFect8/SCO           | 54918      | 46759 to 63078   | ****    | <0.0001          |
| PF14/SCO vs. mitFect9/SCO           | 66889      | 58729 to 75049   | ****    | <0.0001          |
| PF14/SCO vs. mtCPP1/SCO             | 66223      | 58063 to 74382   | ****    | <0.0001          |
| PF14/SCO vs. mtCPP1 + PF14/SCO      | 25211      | 17052 to 33371   | ****    | <0.0001          |

**Table S2a.** Complete statistical data analysis for Fig. 2a. Ordinary two-way analysis of variance (ANOVA) with Dunnett's multiple comparison test of untreated vs. each complex formulation at MR3, 7, and 10.

| Dunnett's multiple comparisons test                     | Predicted (LS) mean diff. | 95% CI of diff.  | Summary | Adjusted P Value |
|---------------------------------------------------------|---------------------------|------------------|---------|------------------|
| <b>MR3</b>                                              |                           |                  |         |                  |
| Untreated vs. PF14/ASO [UCP2]                           | -6.124                    | -48.07 to 35.82  | ns      | 0.9994           |
| Untreated vs. mitFect1/ASO [UCP2]                       | -28.68                    | -70.62 to 13.26  | ns      | 0.3731           |
| Untreated vs. mitFect3/ASO [UCP2]                       | -82.4                     | -124.3 to -40.46 | ****    | <0.0001          |
| Untreated vs. mitFect4/ASO [UCP2]                       | -108.6                    | -150.5 to -66.63 | ****    | <0.0001          |
| Untreated vs. mitFect5/ASO [UCP2]                       | -21.16                    | -63.10 to 20.78  | ns      | 0.758            |
| Untreated vs. mitFect6/ASO [UCP2]                       | -43.97                    | -85.92 to -2.033 | *       | 0.0342           |
| Untreated vs. mitFect7/ASO [UCP2]                       | -101.8                    | -143.8 to -59.87 | ****    | <0.0001          |
| Untreated vs. mitFect8/ASO [UCP2]                       | -126.6                    | -168.5 to -84.65 | ****    | <0.0001          |
| Untreated vs. mitFect9/ASO [UCP2]                       | -39.76                    | -81.70 to 2.179  | ns      | 0.0737           |
| Untreated vs. mtCPP1/ASO [UCP2]                         | -51.9                     | -93.84 to -9.957 | **      | 0.0065           |
| Untreated vs. mtCPP1 + PF14/ASO [UCP2]                  | -44.23                    | -86.18 to -2.294 | *       | 0.0324           |
| Untreated vs. LF2000/ASO [UCP2]                         | -22.2                     | -64.14 to 19.74  | ns      | 0.7036           |
| Untreated vs. ASO [UCP2]                                | -34.43                    | -76.37 to 7.513  | ns      | 0.1736           |
| Untreated vs. Unrelated Oligo                           | -17.6                     | -59.54 to 24.34  | ns      | 0.9103           |
| Untreated vs. DNP 150 $\mu$ M                           | -18.71                    | -60.65 to 23.23  | ns      | 0.8702           |
| Untreated vs. H <sub>2</sub> O <sub>2</sub> 400 $\mu$ M | -25.84                    | -67.78 to 16.10  | ns      | 0.509            |
| Untreated vs. H <sub>2</sub> O <sub>2</sub> 800 $\mu$ M | -38.55                    | -80.49 to 3.394  | ns      | 0.0907           |
| Dunnett's multiple comparisons test                     | Predicted (LS) mean diff. | 95% CI of diff.  | Summary | Adjusted P Value |
| <b>MR7</b>                                              |                           |                  |         |                  |
| Untreated vs. PF14/ASO [UCP2]                           | -32.59                    | -74.53 to 9.347  | ns      | 0.2259           |
| Untreated vs. mitFect1/ASO [UCP2]                       | -60.88                    | -102.8 to -18.94 | ***     | 0.0008           |
| Untreated vs. mitFect3/ASO [UCP2]                       | -120.8                    | -162.7 to -78.86 | ****    | <0.0001          |
| Untreated vs. mitFect4/ASO [UCP2]                       | -168.3                    | -210.2 to -126.4 | ****    | <0.0001          |
| Untreated vs. mitFect5/ASO [UCP2]                       | -35.13                    | -77.07 to 6.809  | ns      | 0.1562           |
| Untreated vs. mitFect6/ASO [UCP2]                       | -48.31                    | -90.25 to -6.367 | *       | 0.0143           |
| Untreated vs. mitFect7/ASO [UCP2]                       | -82.89                    | -124.8 to -40.95 | ****    | <0.0001          |
| Untreated vs. mitFect8/ASO [UCP2]                       | -94.92                    | -136.9 to -52.98 | ****    | <0.0001          |
| Untreated vs. mitFect9/ASO [UCP2]                       | -21.78                    | -63.72 to 20.16  | ns      | 0.7258           |
| Untreated vs. mtCPP1/ASO [UCP2]                         | -106.2                    | -148.1 to -64.22 | ****    | <0.0001          |
| Untreated vs. mtCPP1 + PF14/ASO [UCP2]                  | -52.86                    | -94.80 to -10.92 | **      | 0.0052           |
| Untreated vs. LF2000/ASO [UCP2]                         | -22.2                     | -64.14 to 19.74  | ns      | 0.7036           |
| Untreated vs. ASO [UCP2]                                | -34.43                    | -76.37 to 7.513  | ns      | 0.1736           |
| Untreated vs. Unrelated Oligo                           | -17.6                     | -59.54 to 24.34  | ns      | 0.9103           |
| Untreated vs. DNP 150 $\mu$ M                           | -18.71                    | -60.65 to 23.23  | ns      | 0.8702           |



|                                                    |                                  |                        |                |                         |
|----------------------------------------------------|----------------------------------|------------------------|----------------|-------------------------|
| Untreated vs. H <sub>2</sub> O <sub>2</sub> 400 μM | -25.84                           | -67.78 to 16.10        | ns             | 0.509                   |
| Untreated vs. H <sub>2</sub> O <sub>2</sub> 800 μM | -38.55                           | -80.49 to 3.394        | ns             | 0.0907                  |
| <b>Dunnett's multiple comparisons test</b>         | <b>Predicted (LS) mean diff.</b> | <b>95% CI of diff.</b> | <b>Summary</b> | <b>Adjusted P Value</b> |
| <b>MR10</b>                                        |                                  |                        |                |                         |
| Untreated vs. PF14/ASO [UCP2]                      | -68.14                           | -110.1 to -26.15       | ***            | 0.0001                  |
| Untreated vs. mitFect1/ASO [UCP2]                  | -96.46                           | -138.4 to -54.47       | ****           | <0.0001                 |
| Untreated vs. mitFect3/ASO [UCP2]                  | -140.4                           | -182.4 to -98.43       | ****           | <0.0001                 |
| Untreated vs. mitFect4/ASO [UCP2]                  | -105.8                           | -152.8 to -58.88       | ****           | <0.0001                 |
| Untreated vs. mitFect5/ASO [UCP2]                  | -28.98                           | -70.96 to 13.01        | ns             | 0.3633                  |
| Untreated vs. mitFect6/ASO [UCP2]                  | -59.56                           | -101.5 to -17.57       | **             | 0.0011                  |
| Untreated vs. mitFect7/ASO [UCP2]                  | -110.2                           | -152.2 to -68.26       | ****           | <0.0001                 |
| Untreated vs. mitFect8/ASO [UCP2]                  | -97.39                           | -139.4 to -55.40       | ****           | <0.0001                 |
| Untreated vs. mitFect9/ASO [UCP2]                  | -31.4                            | -73.39 to 10.58        | ns             | 0.2676                  |
| Untreated vs. mtCPP1/ASO [UCP2]                    | -109.1                           | -151.1 to -67.12       | ****           | <0.0001                 |
| Untreated vs. mtCPP1 + PF14/ASO [UCP2]             | -55.27                           | -97.25 to -13.29       | **             | 0.003                   |
| Untreated vs. LF2000/ASO [UCP2]                    | -22.2                            | -64.19 to 19.78        | ns             | 0.7077                  |
| Untreated vs. ASO [UCP2]                           | -34.43                           | -76.41 to 7.556        | ns             | 0.1752                  |
| Untreated vs. Unrelated Oligo                      | -17.6                            | -59.58 to 24.39        | ns             | 0.9126                  |
| Untreated vs. DNP 150 μM                           | -18.71                           | -60.69 to 23.28        | ns             | 0.8732                  |
| Untreated vs. H <sub>2</sub> O <sub>2</sub> 400 μM | -25.84                           | -67.82 to 16.15        | ns             | 0.5132                  |
| Untreated vs. H <sub>2</sub> O <sub>2</sub> 800 μM | -38.55                           | -80.53 to 3.437        | ns             | 0.0915                  |

**Table S2b.** Complete statistical data analysis for Fig. 2b. Ordinary two-way analysis of variance (ANOVA) with Dunnett's multiple comparison test of untreated vs. each complex formulation at MR3, 7, and 10.

| <b>Dunnett's multiple comparisons test</b> | <b>Predicted (LS) mean diff.</b> | <b>95% CI of diff.</b> | <b>Summary</b> | <b>Adjusted P Value</b> |
|--------------------------------------------|----------------------------------|------------------------|----------------|-------------------------|
| <b>MR3</b>                                 |                                  |                        |                |                         |
| Untreated vs. PF14/ASO [UCP2]              | -20648                           | -82662 to 41365        | ns             | 0.9854                  |
| Untreated vs. mitFect1/ASO [UCP2]          | -15446                           | -77460 to 46568        | ns             | 0.9958                  |
| Untreated vs. mitFect3/ASO [UCP2]          | -57705                           | -119719 to 4308        | ns             | 0.0836                  |
| Untreated vs. mitFect4/ASO [UCP2]          | -28705                           | -90719 to 33308        | ns             | 0.8406                  |
| Untreated vs. mitFect5/ASO [UCP2]          | -86551                           | -148564 to -24537      | **             | 0.0014                  |
| Untreated vs. mitFect6/ASO [UCP2]          | -161043                          | -223057 to -99029      | ****           | <0.0001                 |
| Untreated vs. mitFect7/ASO [UCP2]          | -213681                          | -275694 to -151667     | ****           | <0.0001                 |
| Untreated vs. mitFect8/ASO [UCP2]          | -167412                          | -229426 to -105398     | ****           | <0.0001                 |
| Untreated vs. mitFect9/ASO [UCP2]          | -128684                          | -190698 to -66670      | ****           | <0.0001                 |
| Untreated vs. mtCPP1/ASO [UCP2]            | -161599                          | -223613 to -99585      | ****           | <0.0001                 |
| Untreated vs. mtCPP1 + PF14/ASO [UCP2]     | 50202                            | -11812 to 112215       | ns             | 0.1861                  |

|                                                         |                                      |                        |                |                             |
|---------------------------------------------------------|--------------------------------------|------------------------|----------------|-----------------------------|
| Untreated vs. LF2000/ASO [UCP2]                         | 46285                                | -15728 to 108299       | ns             | 0.2686                      |
| Untreated vs. ASO [UCP2]                                | 8809                                 | -53205 to 70822        | ns             | 0.9994                      |
| Untreated vs. Unrelated Oligo                           | 7574                                 | -54440 to 69588        | ns             | 0.9995                      |
| Untreated vs. DNP 150 $\mu$ M                           | 9464                                 | -52550 to 71477        | ns             | 0.9994                      |
| Untreated vs. H <sub>2</sub> O <sub>2</sub> 400 $\mu$ M | 24464                                | -37549 to 86478        | ns             | 0.9406                      |
| Untreated vs. DMSO 20%                                  | 109765                               | 47752 to 171779        | ****           | <0.0001                     |
| <b>Dunnett's multiple comparisons test</b>              | <b>Predicted (LS)<br/>mean diff.</b> | <b>95% CI of diff.</b> | <b>Summary</b> | <b>Adjusted P<br/>Value</b> |
| <b>MR7</b>                                              |                                      |                        |                |                             |
| Untreated vs. PF14/ASO [UCP2]                           | -32333                               | -101737 to 37072       | ns             | 0.8378                      |
| Untreated vs. mitFect1/ASO [UCP2]                       | -95494                               | -157571 to -33417      | ***            | 0.0003                      |
| Untreated vs. mitFect3/ASO [UCP2]                       | -187566                              | -249644 to -125489     | ****           | <0.0001                     |
| Untreated vs. mitFect4/ASO [UCP2]                       | -151652                              | -213729 to -89575      | ****           | <0.0001                     |
| Untreated vs. mitFect5/ASO [UCP2]                       | -127785                              | -189863 to -65708      | ****           | <0.0001                     |
| Untreated vs. mitFect6/ASO [UCP2]                       | -161134                              | -223212 to -99057      | ****           | <0.0001                     |
| Untreated vs. mitFect7/ASO [UCP2]                       | -212318                              | -274395 to -150240     | ****           | <0.0001                     |
| Untreated vs. mitFect8/ASO [UCP2]                       | -172691                              | -234768 to -110614     | ****           | <0.0001                     |
| Untreated vs. mitFect9/ASO [UCP2]                       | -49142                               | -111219 to 12935       | ns             | 0.2082                      |
| Untreated vs. mtCPP1/ASO [UCP2]                         | -186313                              | -248390 to -124236     | ****           | <0.0001                     |
| Untreated vs. mtCPP1 + PF14/ASO [UCP2]                  | -86682                               | -148760 to -24605      | **             | 0.0013                      |
| Untreated vs. LF2000/ASO [UCP2]                         | 46285                                | -15792 to 108363       | ns             | 0.271                       |
| Untreated vs. ASO [UCP2]                                | 8809                                 | -53269 to 70886        | ns             | 0.9994                      |
| Untreated vs. Unrelated Oligo                           | 7574                                 | -54503 to 69651        | ns             | 0.9995                      |
| Untreated vs. DNP 150 $\mu$ M                           | 9464                                 | -52614 to 71541        | ns             | 0.9994                      |
| Untreated vs. H <sub>2</sub> O <sub>2</sub> 400 $\mu$ M | 24464                                | -37613 to 86542        | ns             | 0.9424                      |
| Untreated vs. DMSO 20%                                  | 109765                               | 47688 to 171843        | ****           | <0.0001                     |
| <b>Dunnett's multiple comparisons test</b>              | <b>Predicted (LS)<br/>mean diff.</b> | <b>95% CI of diff.</b> | <b>Summary</b> | <b>Adjusted P<br/>Value</b> |
| <b>MR10</b>                                             |                                      |                        |                |                             |
| Untreated vs. PF14/ASO [UCP2]                           | -44880                               | -114284 to 24525       | ns             | 0.4475                      |
| Untreated vs. mitFect1/ASO [UCP2]                       | -181422                              | -243500 to -119345     | ****           | <0.0001                     |
| Untreated vs. mitFect3/ASO [UCP2]                       | -208855                              | -270932 to -146777     | ****           | <0.0001                     |
| Untreated vs. mitFect4/ASO [UCP2]                       | -159915                              | -221993 to -97838      | ****           | <0.0001                     |
| Untreated vs. mitFect5/ASO [UCP2]                       | -95383                               | -157461 to -33306      | ***            | 0.0003                      |
| Untreated vs. mitFect6/ASO [UCP2]                       | -158735                              | -220812 to -96658      | ****           | <0.0001                     |
| Untreated vs. mitFect7/ASO [UCP2]                       | -236400                              | -298477 to -174323     | ****           | <0.0001                     |
| Untreated vs. mitFect8/ASO [UCP2]                       | -177261                              | -239338 to -115184     | ****           | <0.0001                     |
| Untreated vs. mitFect9/ASO [UCP2]                       | -96518                               | -158595 to -34441      | ***            | 0.0003                      |
| Untreated vs. mtCPP1/ASO [UCP2]                         | -116071                              | -178149 to -53994      | ****           | <0.0001                     |
| Untreated vs. mtCPP1 + PF14/ASO [UCP2]                  | -150884                              | -212962 to -88807      | ****           | <0.0001                     |

|                                                         |        |                  |      |         |
|---------------------------------------------------------|--------|------------------|------|---------|
| Untreated vs. LF2000/ASO [UCP2]                         | 46285  | -15792 to 108363 | ns   | 0.271   |
| Untreated vs. ASO [UCP2]                                | 8809   | -53269 to 70886  | ns   | 0.9994  |
| Untreated vs. Unrelated Oligo                           | 7574   | -54503 to 69651  | ns   | 0.9995  |
| Untreated vs. DNP 150 $\mu$ M                           | 9464   | -52614 to 71541  | ns   | 0.9994  |
| Untreated vs. H <sub>2</sub> O <sub>2</sub> 400 $\mu$ M | 24464  | -37613 to 86542  | ns   | 0.9424  |
| Untreated vs. DMSO 20%                                  | 109765 | 47688 to 171843  | **** | <0.0001 |

**Table S2c.** Complete statistical data analysis for Fig. 2c. Ordinary two-way analysis of variance (ANOVA) with Dunnett's multiple comparison test of untreated vs. each complex formulation at MR3, 7, and 10.

| Dunnett's multiple comparisons test     | Predicted (LS) mean diff. | 95.00% CI of diff. | Summary | Adjusted P Value |
|-----------------------------------------|---------------------------|--------------------|---------|------------------|
| <b>MR3</b>                              |                           |                    |         |                  |
| Untreated vs. PF14/ASO [UCP 2]          | -0.6348                   | -15.24 to 13.97    | ns      | 0.9998           |
| Untreated vs. mitFect1/ASO [UCP2]       | -5.803                    | -20.40 to 8.797    | ns      | 0.8827           |
| Untreated vs. mitFect3/ASO [UCP2]       | -23.72                    | -38.32 to -9.117   | ***     | 0.0005           |
| Untreated vs. mitFect4/ASO [UCP2]       | -24.24                    | -38.84 to -9.640   | ***     | 0.0004           |
| Untreated vs. mitFect5/ASO [UCP2]       | -4.15                     | -18.75 to 10.45    | ns      | 0.9875           |
| Untreated vs. mitFect6/ASO [UCP2]       | -21.55                    | -36.15 to -6.948   | **      | 0.0015           |
| Untreated vs. mitFect7/ASO [UCP2]       | -30.5                     | -45.10 to -15.90   | ****    | <0.0001          |
| Untreated vs. mitFect8/ASO [UCP2]       | -36.96                    | -51.56 to -22.36   | ****    | <0.0001          |
| Untreated vs. mitFect9/ASO [UCP2]       | -7.444                    | -22.04 to 7.157    | ns      | 0.6657           |
| Untreated vs. mtCPP1/ASO [UCP 2]        | -22.33                    | -36.93 to -7.732   | ***     | 0.001            |
| Untreated vs. mtCPP1 + PF14/ASO [UCP 2] | -16.7                     | -31.30 to -2.099   | *       | 0.0183           |
| Untreated vs. LF2000/ASO [UCP 2]        | 3.409                     | -11.19 to 18.01    | ns      | 0.9958           |
| Untreated vs. ASO [UCP 2]               | 3.602                     | -11.00 to 18.20    | ns      | 0.9925           |
| Untreated vs. Unrelated Oligo           | -1.354                    | -15.95 to 13.25    | ns      | 0.9996           |
| Dunnett's multiple comparisons test     | Predicted (LS) mean diff. | 95.00% CI of diff. | Summary | Adjusted P Value |
| <b>MR7</b>                              |                           |                    |         |                  |
| Untreated vs. PF14/ASO [UCP 2]          | -0.6348                   | -15.24 to 13.97    | ns      | 0.9998           |
| Untreated vs. mitFect1/ASO [UCP2]       | -5.803                    | -20.40 to 8.797    | ns      | 0.8827           |
| Untreated vs. mitFect3/ASO [UCP2]       | -23.72                    | -38.32 to -9.117   | ***     | 0.0005           |
| Untreated vs. mitFect4/ASO [UCP2]       | -24.24                    | -38.84 to -9.640   | ***     | 0.0004           |
| Untreated vs. mitFect5/ASO [UCP2]       | -4.15                     | -18.75 to 10.45    | ns      | 0.9875           |
| Untreated vs. mitFect6/ASO [UCP2]       | -21.55                    | -36.15 to -6.948   | **      | 0.0015           |
| Untreated vs. mitFect7/ASO [UCP2]       | -30.5                     | -45.10 to -15.90   | ****    | <0.0001          |
| Untreated vs. mitFect8/ASO [UCP2]       | -36.96                    | -51.56 to -22.36   | ****    | <0.0001          |
| Untreated vs. mitFect9/ASO [UCP2]       | -7.444                    | -22.04 to 7.157    | ns      | 0.6657           |
| Untreated vs. mtCPP1/ASO [UCP 2]        | -22.33                    | -36.93 to -7.732   | ***     | 0.001            |
| Untreated vs. mtCPP1 + PF14/ASO [UCP 2] | -16.7                     | -31.30 to -2.099   | *       | 0.0183           |
| Untreated vs. LF2000/ASO [UCP 2]        | 3.409                     | -11.19 to 18.01    | ns      | 0.9958           |
| Untreated vs. ASO [UCP 2]               | 3.602                     | -11.00 to 18.20    | ns      | 0.9925           |

|                                            |                                      |                           |                |                             |
|--------------------------------------------|--------------------------------------|---------------------------|----------------|-----------------------------|
| Untreated vs. Unrelated Oligo              | -1.354                               | -15.95 to 13.25           | ns             | 0.9996                      |
| <b>Dunnett's multiple comparisons test</b> | <b>Predicted (LS)<br/>mean diff.</b> | <b>95.00% CI of diff.</b> | <b>Summary</b> | <b>Adjusted P<br/>Value</b> |
| <b>MR10</b>                                |                                      |                           |                |                             |
| Untreated vs. PF14/ASO [UCP 2]             | -0.6348                              | -15.24 to 13.97           | ns             | 0.9998                      |
| Untreated vs. mitFect1/ASO [UCP2]          | -5.803                               | -20.40 to 8.797           | ns             | 0.8827                      |
| Untreated vs. mitFect3/ASO [UCP2]          | -23.72                               | -38.32 to -9.117          | ***            | 0.0005                      |
| Untreated vs. mitFect4/ASO [UCP2]          | -24.24                               | -38.84 to -9.640          | ***            | 0.0004                      |
| Untreated vs. mitFect5/ASO [UCP2]          | -4.15                                | -18.75 to 10.45           | ns             | 0.9875                      |
| Untreated vs. mitFect6/ASO [UCP2]          | -21.55                               | -36.15 to -6.948          | **             | 0.0015                      |
| Untreated vs. mitFect7/ASO [UCP2]          | -30.5                                | -45.10 to -15.90          | ****           | <0.0001                     |
| Untreated vs. mitFect8/ASO [UCP2]          | -36.96                               | -51.56 to -22.36          | ****           | <0.0001                     |
| Untreated vs. mitFect9/ASO [UCP2]          | -7.444                               | -22.04 to 7.157           | ns             | 0.6657                      |
| Untreated vs. mtCPP1/ASO [UCP 2]           | -22.33                               | -36.93 to -7.732          | ***            | 0.001                       |
| Untreated vs. mtCPP1 +PF14/ASO [UCP 2]     | -16.7                                | -31.30 to -2.099          | *              | 0.0183                      |
| Untreated vs. LF2000/ASO [UCP 2]           | 3.409                                | -11.19 to 18.01           | ns             | 0.9958                      |
| Untreated vs. ASO [UCP 2]                  | 3.602                                | -11.00 to 18.20           | ns             | 0.9925                      |
| Untreated vs. Unrelated Oligo              | -1.354                               | -15.95 to 13.25           | ns             | 0.9996                      |

**Table S3a.** Complete statistical data analysis for Fig. 3a. Ordinary two-way analysis of variance (ANOVA) with Dunnett's multiple comparison test of untreated vs. each complex formulation at MR3, 7, and 10.

| Dunnett's multiple comparisons test                     | Predicted (LS) mean diff. | 95% CI of diff.  | Summary | Adjusted P Value |
|---------------------------------------------------------|---------------------------|------------------|---------|------------------|
| <b>MR3</b>                                              |                           |                  |         |                  |
| Untreated vs. PF14/Darm ASO [UCP2]                      | -23.2                     | -79.36 to 32.96  | ns      | 0.919            |
| Untreated vs. mitFect1/Darm ASO [UCP2]                  | -55.15                    | -111.3 to 1.009  | ns      | 0.0573           |
| Untreated vs. mitFect3/Darm ASO [UCP2]                  | -98.89                    | -155.1 to -42.73 | ****    | <0.0001          |
| Untreated vs. mitFect4/Darm ASO [UCP2]                  | -135.3                    | -191.5 to -79.16 | ****    | <0.0001          |
| Untreated vs. mitFect5/Darm ASO [UCP2]                  | -67.79                    | -124.0 to -11.63 | **      | 0.0086           |
| Untreated vs. mitFect6/Darm ASO [UCP2]                  | -90.87                    | -147.0 to -34.71 | ***     | 0.0001           |
| Untreated vs. mitFect7/Darm ASO [UCP2]                  | -144.6                    | -200.8 to -88.48 | ****    | <0.0001          |
| Untreated vs. mitFect8/Darm ASO [UCP2]                  | -174.6                    | -230.7 to -118.4 | ****    | <0.0001          |
| Untreated vs. mitFect9/Darm ASO [UCP2]                  | -14.77                    | -70.93 to 41.39  | ns      | 0.9954           |
| Untreated vs. mtCPP1/Darm ASO [UCP2]                    | -22.59                    | -78.75 to 33.57  | ns      | 0.9322           |
| Untreated vs. mtCPP1 + PF14/Darm ASO [UCP2]             | -24.01                    | -80.18 to 32.15  | ns      | 0.8991           |
| Untreated vs. LF2000/Darm ASO [UCP2]                    | -52.23                    | -108.4 to 3.931  | ns      | 0.0839           |
| Untreated vs. Darm ASO [UCP2]                           | -71.28                    | -127.4 to -15.11 | **      | 0.0048           |
| Untreated vs. Unrelated Oligo                           | 1.436                     | -54.73 to 57.60  | ns      | >0.9999          |
| Untreated vs. DNP 150 $\mu$ M                           | -68.6                     | -124.8 to -12.43 | **      | 0.0076           |
| Untreated vs. H <sub>2</sub> O <sub>2</sub> 400 $\mu$ M | -78.13                    | -134.3 to -21.97 | **      | 0.0014           |
| Untreated vs. H <sub>2</sub> O <sub>2</sub> 800 $\mu$ M | -50.91                    | -107.1 to 5.250  | ns      | 0.0991           |
| Dunnett's multiple comparisons test                     | Predicted (LS) mean diff. | 95% CI of diff.  | Summary | Adjusted P Value |
| <b>MR7</b>                                              |                           |                  |         |                  |
| Untreated vs. PF14/Darm ASO [UCP2]                      | -49.4                     | -105.6 to 6.761  | ns      | 0.119            |
| Untreated vs. mitFect1/Darm ASO [UCP2]                  | -91.75                    | -147.9 to -35.59 | ***     | 0.0001           |
| Untreated vs. mitFect3/Darm ASO [UCP2]                  | -147.2                    | -203.4 to -91.05 | ****    | <0.0001          |
| Untreated vs. mitFect4/Darm ASO [UCP2]                  | -201                      | -257.1 to -144.8 | ****    | <0.0001          |
| Untreated vs. mitFect5/Darm ASO [UCP2]                  | -71.23                    | -127.4 to -15.07 | **      | 0.0048           |
| Untreated vs. mitFect6/Darm ASO [UCP2]                  | -113                      | -169.2 to -56.84 | ****    | <0.0001          |
| Untreated vs. mitFect7/Darm ASO [UCP2]                  | -184.9                    | -241.1 to -128.8 | ****    | <0.0001          |
| Untreated vs. mitFect8/Darm ASO [UCP2]                  | -186.3                    | -242.5 to -130.2 | ****    | <0.0001          |
| Untreated vs. mitFect9/Darm ASO [UCP2]                  | 2.833                     | -53.33 to 58.99  | ns      | 0.9998           |
| Untreated vs. mtCPP1/Darm ASO [UCP2]                    | -48.85                    | -105.0 to 7.309  | ns      | 0.1269           |
| Untreated vs. mtCPP1 + PF14/Darm ASO [UCP2]             | -38.65                    | -94.81 to 17.51  | ns      | 0.3653           |
| Untreated vs. LF2000/Darm ASO [UCP2]                    | -52.23                    | -108.4 to 3.931  | ns      | 0.0839           |
| Untreated vs. Darm ASO [UCP2]                           | -71.28                    | -127.4 to -15.11 | **      | 0.0048           |
| Untreated vs. Unrelated Oligo                           | 1.436                     | -54.73 to 57.60  | ns      | >0.9999          |
| Untreated vs. DNP 150 $\mu$ M                           | -68.6                     | -124.8 to -12.43 | **      | 0.0076           |

|                                                    |                                  |                        |                |                         |
|----------------------------------------------------|----------------------------------|------------------------|----------------|-------------------------|
| Untreated vs. H <sub>2</sub> O <sub>2</sub> 400 μM | -78.13                           | -134.3 to -21.97       | **             | 0.0014                  |
| Untreated vs. H <sub>2</sub> O <sub>2</sub> 800 μM | -50.91                           | -107.1 to 5.250        | ns             | 0.0991                  |
| <b>Dunnett's multiple comparisons test</b>         | <b>Predicted (LS) mean diff.</b> | <b>95% CI of diff.</b> | <b>Summary</b> | <b>Adjusted P Value</b> |
| <b>MR10</b>                                        |                                  |                        |                |                         |
| Untreated vs. PF14/Darm ASO [UCP2]                 | -130                             | -186.1 to -73.81       | ****           | <0.0001                 |
| Untreated vs. mitFect1/Darm ASO [UCP2]             | -146.3                           | -202.4 to -90.12       | ****           | <0.0001                 |
| Untreated vs. mitFect3/Darm ASO [UCP2]             | -191.9                           | -248.1 to -135.8       | ****           | <0.0001                 |
| Untreated vs. mitFect4/Darm ASO [UCP2]             | -203.6                           | -259.8 to -147.5       | ****           | <0.0001                 |
| Untreated vs. mitFect5/Darm ASO [UCP2]             | -90.28                           | -146.4 to -34.12       | ***            | 0.0001                  |
| Untreated vs. mitFect6/Darm ASO [UCP2]             | -152.7                           | -208.9 to -96.55       | ****           | <0.0001                 |
| Untreated vs. mitFect7/Darm ASO [UCP2]             | -236.9                           | -293.0 to -180.7       | ****           | <0.0001                 |
| Untreated vs. mitFect8/Darm ASO [UCP2]             | -201.8                           | -257.9 to -145.6       | ****           | <0.0001                 |
| Untreated vs. mitFect9/Darm ASO [UCP2]             | -9.55                            | -65.71 to 46.61        | ns             | 0.9993                  |
| Untreated vs. mtCPP1/Darm ASO [UCP2]               | -92.48                           | -148.6 to -36.32       | ****           | <0.0001                 |
| Untreated vs. mtCPP1 + PF14/Darm ASO [UCP2]        | -100.8                           | -156.9 to -44.62       | ****           | <0.0001                 |
| Untreated vs. LF2000/Darm ASO [UCP2]               | -52.23                           | -108.4 to 3.931        | ns             | 0.0839                  |
| Untreated vs. Darm ASO [UCP2]                      | -71.28                           | -127.4 to -15.11       | **             | 0.0048                  |
| Untreated vs. Unrelated Oligo                      | 1.436                            | -54.73 to 57.60        | ns             | >0.9999                 |
| Untreated vs. DNP 150 μM                           | -68.6                            | -124.8 to -12.43       | **             | 0.0076                  |
| Untreated vs. H <sub>2</sub> O <sub>2</sub> 400 μM | -78.13                           | -134.3 to -21.97       | **             | 0.0014                  |
| Untreated vs. H <sub>2</sub> O <sub>2</sub> 800 μM | -50.91                           | -107.1 to 5.250        | ns             | 0.0991                  |

**Table S3b.** Complete statistical data analysis for Fig. 3b. Ordinary two-way analysis of variance (ANOVA) with Dunnett's multiple comparison test of untreated vs. each complex formulation at MR3, 7, and 10.

| <b>Dunnett's multiple comparisons test</b>  | <b>Predicted (LS) mean diff.</b> | <b>95% CI of diff.</b> | <b>Summary</b> | <b>Adjusted P Value</b> |
|---------------------------------------------|----------------------------------|------------------------|----------------|-------------------------|
| <b>MR3</b>                                  |                                  |                        |                |                         |
| Untreated vs. PF14/Darm ASO [UCP2]          | -122.7                           | -235.9 to -9.537       | *              | 0.0255                  |
| Untreated vs. mitFect1/Darm ASO [UCP2]      | -276.5                           | -389.7 to -163.3       | ****           | <0.0001                 |
| Untreated vs. mitFect3/Darm ASO [UCP2]      | -380.5                           | -493.7 to -267.3       | ****           | <0.0001                 |
| Untreated vs. mitFect4/Darm ASO [UCP2]      | -471.4                           | -584.6 to -358.2       | ****           | <0.0001                 |
| Untreated vs. mitFect5/Darm ASO [UCP2]      | -125.2                           | -238.4 to -12.03       | *              | 0.0212                  |
| Untreated vs. mitFect6/Darm ASO [UCP2]      | -137.2                           | -250.4 to -24.00       | **             | 0.0083                  |
| Untreated vs. mitFect7/Darm ASO [UCP2]      | -187.5                           | -300.7 to -74.26       | ****           | <0.0001                 |
| Untreated vs. mitFect8/Darm ASO [UCP2]      | -306.2                           | -419.4 to -193.0       | ****           | <0.0001                 |
| Untreated vs. mitFect9/Darm ASO [UCP2]      | -61.11                           | -174.3 to 52.08        | ns             | 0.6799                  |
| Untreated vs. mtCPP1/Darm ASO [UCP2]        | -81.59                           | -194.8 to 31.60        | ns             | 0.3086                  |
| Untreated vs. mtCPP1 + PF14/Darm ASO [UCP2] | -155.8                           | -269.0 to -42.57       | **             | 0.0017                  |

|                                                         |                                      |                        |                |                             |
|---------------------------------------------------------|--------------------------------------|------------------------|----------------|-----------------------------|
| Untreated vs. LF2000/Darm ASO [UCP2]                    | -69.52                               | -182.7 to 43.67        | ns             | 0.5137                      |
| Untreated vs. Darm ASO [UCP2]                           | -150.5                               | -263.7 to -37.35       | **             | 0.0027                      |
| Untreated vs. Unrelated Oligo                           | -28.82                               | -142.0 to 84.37        | ns             | 0.9957                      |
| Untreated vs. DNP 150 $\mu$ M                           | -164.9                               | -278.1 to -51.70       | ***            | 0.0007                      |
| Untreated vs. H <sub>2</sub> O <sub>2</sub> 400 $\mu$ M | -181.9                               | -295.1 to -68.73       | ***            | 0.0001                      |
| Untreated vs. H <sub>2</sub> O <sub>2</sub> 800 $\mu$ M | -46.79                               | -160.0 to 66.40        | ns             | 0.9184                      |
| <b>Dunnett's multiple comparisons test</b>              | <b>Predicted (LS)<br/>mean diff.</b> | <b>95% CI of diff.</b> | <b>Summary</b> | <b>Adjusted<br/>P Value</b> |
| <b>MR7</b>                                              |                                      |                        |                |                             |
| Untreated vs. PF14/Darm ASO [UCP2]                      | -145.8                               | -258.9 to -32.56       | **             | 0.004                       |
| Untreated vs. mitFect1/Darm ASO [UCP2]                  | -448.9                               | -562.1 to -335.7       | ****           | <0.0001                     |
| Untreated vs. mitFect3/Darm ASO [UCP2]                  | -426.7                               | -539.9 to -313.5       | ****           | <0.0001                     |
| Untreated vs. mitFect4/Darm ASO [UCP2]                  | -620                                 | -733.2 to -506.8       | ****           | <0.0001                     |
| Untreated vs. mitFect5/Darm ASO [UCP2]                  | -123.7                               | -236.9 to -10.54       | *              | 0.0237                      |
| Untreated vs. mitFect6/Darm ASO [UCP2]                  | -160.6                               | -273.8 to -47.38       | **             | 0.0011                      |
| Untreated vs. mitFect7/Darm ASO [UCP2]                  | -232.6                               | -345.8 to -119.4       | ****           | <0.0001                     |
| Untreated vs. mitFect8/Darm ASO [UCP2]                  | -230.5                               | -343.7 to -117.3       | ****           | <0.0001                     |
| Untreated vs. mitFect9/Darm ASO [UCP2]                  | -32.49                               | -145.7 to 80.71        | ns             | 0.9917                      |
| Untreated vs. mtCPP1/Darm ASO [UCP2]                    | -130.5                               | -243.7 to -17.33       | *              | 0.0141                      |
| Untreated vs. mtCPP1 + PF14/Darm ASO [UCP2]             | -87.02                               | -200.2 to 26.18        | ns             | 0.237                       |
| Untreated vs. LF2000/Darm ASO [UCP2]                    | -69.52                               | -182.7 to 43.67        | ns             | 0.5137                      |
| Untreated vs. Darm ASO [UCP2]                           | -150.5                               | -263.7 to -37.35       | **             | 0.0027                      |
| Untreated vs. Unrelated Oligo                           | -28.82                               | -142.0 to 84.37        | ns             | 0.9957                      |
| Untreated vs. DNP 150 $\mu$ M                           | -164.9                               | -278.1 to -51.70       | ***            | 0.0007                      |
| Untreated vs. H <sub>2</sub> O <sub>2</sub> 400 $\mu$ M | -181.9                               | -295.1 to -68.73       | ***            | 0.0001                      |
| Untreated vs. H <sub>2</sub> O <sub>2</sub> 800 $\mu$ M | -46.79                               | -160.0 to 66.40        | ns             | 0.9184                      |
| <b>Dunnett's multiple comparisons test</b>              | <b>Predicted (LS)<br/>mean diff.</b> | <b>95% CI of diff.</b> | <b>Summary</b> | <b>Adjusted<br/>P Value</b> |
| <b>MR10</b>                                             |                                      |                        |                |                             |
| Untreated vs. PF14/Darm ASO [UCP2]                      | -207                                 | -320.3 to -93.67       | ****           | <0.0001                     |
| Untreated vs. mitFect1/Darm ASO [UCP2]                  | -454.4                               | -567.7 to -341.1       | ****           | <0.0001                     |
| Untreated vs. mitFect3/Darm ASO [UCP2]                  | -550.1                               | -663.4 to -436.8       | ****           | <0.0001                     |
| Untreated vs. mitFect4/Darm ASO [UCP2]                  | -739.3                               | -866.0 to -612.6       | ****           | <0.0001                     |
| Untreated vs. mitFect5/Darm ASO [UCP2]                  | -141.5                               | -254.8 to -28.15       | **             | 0.0058                      |
| Untreated vs. mitFect6/Darm ASO [UCP2]                  | -207.4                               | -320.7 to -94.11       | ****           | <0.0001                     |
| Untreated vs. mitFect7/Darm ASO [UCP2]                  | -280.3                               | -393.6 to -166.9       | ****           | <0.0001                     |
| Untreated vs. mitFect8/Darm ASO [UCP2]                  | -217.6                               | -330.9 to -104.3       | ****           | <0.0001                     |
| Untreated vs. mitFect9/Darm ASO [UCP2]                  | -62.84                               | -176.2 to 50.47        | ns             | 0.6499                      |
| Untreated vs. mtCPP1/Darm ASO [UCP2]                    | -147.7                               | -261.0 to -34.40       | **             | 0.0034                      |
| Untreated vs. mtCPP1 + PF14/Darm ASO [UCP2]             | -342.9                               | -456.2 to -229.6       | ****           | <0.0001                     |

|                                                         |        |                  |     |        |
|---------------------------------------------------------|--------|------------------|-----|--------|
| Untreated vs. LF2000/Darm ASO [UCP2]                    | -69.52 | -182.8 to 43.79  | ns  | 0.5178 |
| Untreated vs. Darm ASO [UCP2]                           | -150.5 | -263.9 to -37.23 | **  | 0.0027 |
| Untreated vs. Unrelated Oligo                           | -28.82 | -142.1 to 84.49  | ns  | 0.9957 |
| Untreated vs. DNP 150 $\mu$ M                           | -164.9 | -278.2 to -51.59 | *** | 0.0007 |
| Untreated vs. H <sub>2</sub> O <sub>2</sub> 400 $\mu$ M | -181.9 | -295.2 to -68.62 | *** | 0.0001 |
| Untreated vs. H <sub>2</sub> O <sub>2</sub> 800 $\mu$ M | -46.79 | -160.1 to 66.52  | ns  | 0.9207 |

**Table S3c.** Complete statistical data analysis for Fig. 3c. Ordinary two-way analysis of variance (ANOVA) with Dunnett's multiple comparison test of untreated vs. each complex formulation at MR3, 7, and 10.

| Dunnett's multiple comparisons test                     | Predicted (LS) mean diff. | 95% CI of diff.  | Summary | Adjusted P Value |
|---------------------------------------------------------|---------------------------|------------------|---------|------------------|
| <b>MR3</b>                                              |                           |                  |         |                  |
| Untreated vs. PF14/Darm ASO [UCP2]                      | -50.62                    | -80.91 to -20.33 | ****    | <0.0001          |
| Untreated vs. mitFect1/Darm ASO [UCP2]                  | -64.14                    | -94.43 to -33.86 | ****    | <0.0001          |
| Untreated vs. mitFect3/Darm ASO [UCP2]                  | -51.45                    | -81.74 to -21.17 | ****    | <0.0001          |
| Untreated vs. mitFect4/Darm ASO [UCP2]                  | -53.97                    | -84.26 to -23.69 | ****    | <0.0001          |
| Untreated vs. mitFect5/Darm ASO [UCP2]                  | -59.64                    | -89.92 to -29.35 | ****    | <0.0001          |
| Untreated vs. mitFect6/Darm ASO [UCP2]                  | -90.12                    | -120.4 to -59.84 | ****    | <0.0001          |
| Untreated vs. mitFect7/Darm ASO [UCP2]                  | -100.4                    | -130.7 to -70.12 | ****    | <0.0001          |
| Untreated vs. mitFect8/Darm ASO [UCP2]                  | -90.6                     | -120.9 to -60.32 | ****    | <0.0001          |
| Untreated vs. mitFect9/Darm ASO [UCP2]                  | -0.3495                   | -30.63 to 29.94  | ns      | >0.9999          |
| Untreated vs. mtCPP1/Darm ASO [UCP2]                    | -46.3                     | -76.59 to -16.02 | ***     | 0.0003           |
| Untreated vs. mtCPP1 + PF14/Darm ASO [UCP2]             | -31.79                    | -62.08 to -1.508 | *       | 0.0337           |
| Untreated vs. LF2000/Darm ASO [UCP2]                    | -40.51                    | -70.79 to -10.22 | **      | 0.0025           |
| Untreated vs. Darm ASO [UCP2]                           | -92.03                    | -125.9 to -58.17 | ****    | <0.0001          |
| Untreated vs. Unrelated Oligo                           | -22.22                    | -52.50 to 8.067  | ns      | 0.2893           |
| Untreated vs. DNP 150 $\mu$ M                           | -84.91                    | -115.2 to -54.63 | ****    | <0.0001          |
| Untreated vs. H <sub>2</sub> O <sub>2</sub> 400 $\mu$ M | -99.35                    | -129.6 to -69.06 | ****    | <0.0001          |
| Untreated vs. H <sub>2</sub> O <sub>2</sub> 800 $\mu$ M | -21.23                    | -51.51 to 9.057  | ns      | 0.344            |
| Dunnett's multiple comparisons test                     | Predicted (LS) mean diff. | 95% CI of diff.  | Summary | Adjusted P Value |
| <b>MR7</b>                                              |                           |                  |         |                  |
| Untreated vs. PF14/Darm ASO [UCP2]                      | -34.88                    | -65.17 to -4.597 | *       | 0.0142           |
| Untreated vs. mitFect1/Darm ASO [UCP2]                  | -86.58                    | -116.9 to -56.30 | ****    | <0.0001          |
| Untreated vs. mitFect3/Darm ASO [UCP2]                  | -100.9                    | -131.2 to -70.59 | ****    | <0.0001          |
| Untreated vs. mitFect4/Darm ASO [UCP2]                  | -82.54                    | -112.8 to -52.25 | ****    | <0.0001          |
| Untreated vs. mitFect5/Darm ASO [UCP2]                  | -43.79                    | -74.08 to -13.51 | ***     | 0.0008           |
| Untreated vs. mitFect6/Darm ASO [UCP2]                  | -71.24                    | -101.5 to -40.95 | ****    | <0.0001          |
| Untreated vs. mitFect7/Darm ASO [UCP2]                  | -92.84                    | -123.1 to -62.55 | ****    | <0.0001          |
| Untreated vs. mitFect8/Darm ASO [UCP2]                  | -72.22                    | -102.5 to -41.94 | ****    | <0.0001          |



|                                                         |                                      |                        |                |                             |
|---------------------------------------------------------|--------------------------------------|------------------------|----------------|-----------------------------|
| Untreated vs. mitFect9/Darm ASO [UCP2]                  | 19.72                                | -10.57 to 50.01        | ns             | 0.4382                      |
| Untreated vs. mtCPP1/Darm ASO [UCP2]                    | -75.32                               | -105.6 to -45.04       | ****           | <0.0001                     |
| Untreated vs. mtCPP1 + PF14/Darm ASO [UCP2]             | -27.08                               | -57.37 to 3.205        | ns             | 0.108                       |
| Untreated vs. LF2000/Darm ASO [UCP2]                    | -40.51                               | -70.79 to -10.22       | **             | 0.0025                      |
| Untreated vs. Darm ASO [UCP2]                           | -92.03                               | -125.9 to -58.17       | ****           | <0.0001                     |
| Untreated vs. Unrelated Oligo                           | -22.22                               | -52.50 to 8.067        | ns             | 0.2893                      |
| Untreated vs. DNP 150 $\mu$ M                           | -84.91                               | -115.2 to -54.63       | ****           | <0.0001                     |
| Untreated vs. H <sub>2</sub> O <sub>2</sub> 400 $\mu$ M | -99.35                               | -129.6 to -69.06       | ****           | <0.0001                     |
| Untreated vs. H <sub>2</sub> O <sub>2</sub> 800 $\mu$ M | -21.23                               | -51.51 to 9.057        | ns             | 0.344                       |
| <b>Dunnett's multiple comparisons test</b>              | <b>Predicted (LS)<br/>mean diff.</b> | <b>95% CI of diff.</b> | <b>Summary</b> | <b>Adjusted<br/>P Value</b> |
| <b>MR10</b>                                             |                                      |                        |                |                             |
| Untreated vs. PF14/Darm ASO [UCP2]                      | -31.67                               | -61.96 to -1.386       | *              | 0.0349                      |
| Untreated vs. mitFect1/Darm ASO [UCP2]                  | -87.1                                | -117.4 to -56.82       | ****           | <0.0001                     |
| Untreated vs. mitFect3/Darm ASO [UCP2]                  | -77.75                               | -108.0 to -47.47       | ****           | <0.0001                     |
| Untreated vs. mitFect4/Darm ASO [UCP2]                  | -85.46                               | -115.7 to -55.18       | ****           | <0.0001                     |
| Untreated vs. mitFect5/Darm ASO [UCP2]                  | -40.46                               | -70.74 to -10.17       | **             | 0.0025                      |
| Untreated vs. mitFect6/Darm ASO [UCP2]                  | -58.45                               | -88.74 to -28.17       | ****           | <0.0001                     |
| Untreated vs. mitFect7/Darm ASO [UCP2]                  | -82.31                               | -112.6 to -52.03       | ****           | <0.0001                     |
| Untreated vs. mitFect8/Darm ASO [UCP2]                  | -41.43                               | -71.71 to -11.14       | **             | 0.0018                      |
| Untreated vs. mitFect9/Darm ASO [UCP2]                  | -15.51                               | -45.79 to 14.78        | ns             | 0.7443                      |
| Untreated vs. mtCPP1/Darm ASO [UCP2]                    | -48.3                                | -78.59 to -18.02       | ***            | 0.0002                      |
| Untreated vs. mtCPP1 + PF14/Darm ASO [UCP2]             | -48.52                               | -78.80 to -18.23       | ***            | 0.0001                      |
| Untreated vs. LF2000/Darm ASO [UCP2]                    | -40.51                               | -70.79 to -10.22       | **             | 0.0025                      |
| Untreated vs. Darm ASO [UCP2]                           | -92.03                               | -125.9 to -58.17       | ****           | <0.0001                     |
| Untreated vs. Unrelated Oligo                           | -22.22                               | -52.50 to 8.067        | ns             | 0.2893                      |
| Untreated vs. DNP 150 $\mu$ M                           | -84.91                               | -115.2 to -54.63       | ****           | <0.0001                     |
| Untreated vs. H <sub>2</sub> O <sub>2</sub> 400 $\mu$ M | -99.35                               | -129.6 to -69.06       | ****           | <0.0001                     |
| Untreated vs. H <sub>2</sub> O <sub>2</sub> 800 $\mu$ M | -21.23                               | -51.51 to 9.057        | ns             | 0.344                       |

**Table S4a.** Complete statistical data analysis for Fig. 4a. Ordinary one-way analysis of variance (ANOVA) with Holm-Sidak's multiple comparisons test of untreated vs. each complex formulation at MR3.

| Holm-Sidak's multiple comparisons test         | Mean Diff. | Summary | Adjusted P Value |
|------------------------------------------------|------------|---------|------------------|
| Untreated vs. PF14/D-arm ASO [COX II]          | -25.3      | ****    | <0.0001          |
| Untreated vs. mitFect1/D-arm ASO [COXII]       | 76.55      | ****    | <0.0001          |
| Untreated vs. mitFect3/D-arm ASO [COXII]       | 73.28      | ****    | <0.0001          |
| Untreated vs. mitFect4/D-arm ASO [COXII]       | 76.67      | ****    | <0.0001          |
| Untreated vs. mitFect5/D-arm ASO [COXII]       | 80.07      | ****    | <0.0001          |
| Untreated vs. mitFect6/D-arm ASO [COXII]       | 79.43      | ****    | <0.0001          |
| Untreated vs. mitFect7/D-arm ASO [COXII]       | 71.59      | ****    | <0.0001          |
| Untreated vs. mitFect8/D-arm ASO [COXII]       | 75.36      | ****    | <0.0001          |
| Untreated vs. mitFect9/D-arm ASO [COXII]       | 55.33      | ****    | <0.0001          |
| Untreated vs. mtCPP1/D-arm ASO [COX II]        | 58.61      | ****    | <0.0001          |
| Untreated vs. mtCPP1 + PF14/D-arm ASO [COX II] | 78.01      | ****    | <0.0001          |
| Untreated vs. LF2000/D-arm ASO [COX II]        | 8.342      | ns      | 0.2807           |
| Untreated vs. D-arm ASO [COX II]               | -1.831     | ns      | 0.7151           |
| Untreated vs. Unrelated Oligo                  | -4.578     | ns      | 0.5959           |

**Table S4b.** Complete statistical data analysis for Fig. 4b. Ordinary one-way analysis of variance (ANOVA) with Holm-Sidak's multiple comparisons test of untreated vs. each complex formulation at MR3.

| Dunnett's multiple comparisons test      | Mean Diff. | 95% CI of diff.  | Summary | Adjusted P Value |
|------------------------------------------|------------|------------------|---------|------------------|
| Untreated vs. PF14/D-arm ASO [COXII]     | -4.855     | -31.13 to 21.42  | ns      | 0.9992           |
| Untreated vs. mitFect1/D-arm ASO [COXII] | 15.81      | -10.46 to 42.08  | ns      | 0.4756           |
| Untreated vs. mitFect3/D-arm ASO [COXII] | 21.04      | -5.229 to 47.31  | ns      | 0.175            |
| Untreated vs. mitFect4/D-arm ASO [COXII] | 15.41      | -10.86 to 41.68  | ns      | 0.5063           |
| Untreated vs. mitFect5/D-arm ASO [COXII] | 14.18      | -12.09 to 40.46  | ns      | 0.6052           |
| Untreated vs. mitFect6/D-arm ASO [COXII] | 12.48      | -13.79 to 38.75  | ns      | 0.7441           |
| Untreated vs. mitFect7/D-arm ASO [COXII] | -30.64     | -56.91 to -4.367 | *       | 0.0153           |
| Untreated vs. mitFect8/D-arm ASO [COXII] | -11.92     | -38.19 to 14.35  | ns      | 0.7875           |
| Untreated vs. mitFect9/D-arm ASO [COXII] | 20.86      | -5.411 to 47.13  | ns      | 0.1821           |
| Untreated vs. mtCPP1/D-arm ASO [COXII]   | -4.517     | -30.79 to 21.75  | ns      | 0.9993           |
| Untreated vs. mtCPP1 + PF14/D-arm ASO    | 36.53      | 10.26 to 62.80   | **      | 0.0027           |
| Untreated vs. LF2000/D-arm ASO [COXII]   | 8.342      | -17.93 to 34.61  | ns      | 0.9713           |
| Untreated vs. D-arm ASO [COXII]          | -1.831     | -28.10 to 24.44  | ns      | 0.9997           |
| Untreated vs. Unrelated Oligo            | -4.578     | -30.85 to 21.69  | ns      | 0.9993           |

**Table S5.** Primers used for the RT-qPCR assay.

| <b>Primers</b> | <b>Biorad Unique assay ID</b> | <b>Sequence</b>                                                                                                                                                                                                                       |
|----------------|-------------------------------|---------------------------------------------------------------------------------------------------------------------------------------------------------------------------------------------------------------------------------------|
| UCP2           | qHsaCID0013753                | GCGCTACTGTACTGGCCAGGGCAGAGTTCATGTATCTCGTCTTG<br>ACCACGTCTACAGGGGAGGCGATGACAGTGGTGCAGAAGCCTGC<br>CCCAAAGGCAGAAGTGAAGTGGCAAGGGAGGTCATCTGTCATGA<br>GGTTGGCTTTCAGGAGGGCATCCTTGATGAGGTCATAGGTCACCA<br>GCTCAGCACAGTTGACAAATGGCATTACGAGCAACA |
| COX II         | qHsaCED0048349                | AAACCGTCTGAACTATCCTGCCCCGCATCATCCTAGTCCTCATCG<br>CCCTCCCATCCCTACGCATCCTTTACATAACAGACGAGGTCAACG<br>ATCCCTCCCTTACCATCAAATCAATTGGCCACCAATGGTAC                                                                                           |
| UBC            | qHsaCED0023867                | AGCTGCTTTCGGCAAAGATCAACCTCTGCTGGTCAGGAGGAATG<br>CCTTCCTTGTCTGGATCTTTGCTTTGACGTTCTCGATGGTGTAC<br>TGGGCTCGACCTCAAGGGTGATGGTCTTGCCAGTGAGTGTCTTCA<br>CGAAGATTTGCAT                                                                        |
| GAPDH          | qHsaCED0038674                | GTATGACAACGAATTTGGCTACAGCAACAGGGTGGTGGACCTCAT<br>GGCCACATGGCCTCCAAGGAGTAAGACCCCTGGACCACCAGCC<br>CCAGCAAGAGCACAAAGAGGAAGAGAGACCCTCACTGCTGGGG<br>AGTCCCTGCCACAC                                                                         |
